# Supplementary material for: Identification of electron-rich mononuclear Ni atoms on TiO2-A distinguished from Ni particles on TiO2-R in guaiacol hydrodeoxygenation pathways
Source: Royal Society of Chemistry journal article supplement (doi:10.1039/d0cy01720e), 2020-10-31
Supplement: d0cy01720e1.pdf [file d0cy01720e1.pdf]

**Identification of electron-rich mononuclear Ni atoms on TiO<sub>2</sub>-A distinguished from Ni particles on TiO<sub>2</sub>-R in guaiacol hydrodeoxygenation pathways**

Xiaoqiang Zhang <sup>a,b</sup>, Peifang Yan <sup>a</sup>, Bin Zhao <sup>c</sup>, Z. Conrad Zhang<sup>\*a</sup>

<sup>a</sup>State Key Laboratory of Catalysis, Dalian National Laboratory for Clean Energy, Dalian Institute of Chemical Physics, Chinese Academy of Sciences, Dalian 116023, P. R. China

<sup>b</sup>University of Chinese Academy of Sciences, Beijing 10049, P. R. China

<sup>c</sup>State Key Laboratory of Fine Chemicals, PSU-DUT Joint Center for Energy Research, School of Chemical Engineering, Dalian University of Technology, Dalian 116024, P. R. China

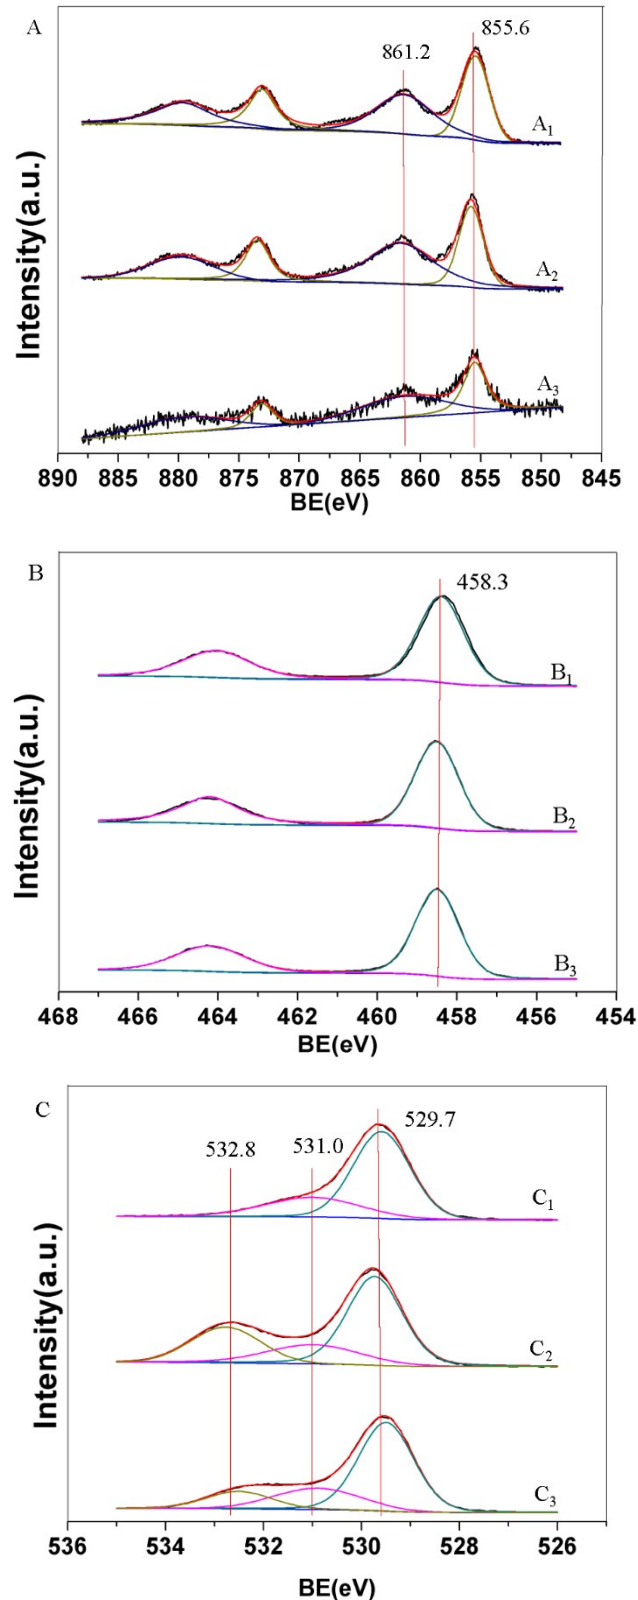

Figure S1. (A) XPS spectra Ni 2p of (A<sub>1</sub>) 3%Ni/TiO<sub>2</sub>-R, (A<sub>2</sub>) 3%Ni/TiO<sub>2</sub>-A, (A<sub>3</sub>) 0.5%Ni/TiO<sub>2</sub>-A; (B) XPS spectra Ti 2p of (B<sub>1</sub>) 3%Ni/TiO<sub>2</sub>-R, (B<sub>2</sub>) 3%Ni/TiO<sub>2</sub>-A, (B<sub>3</sub>) 0.5%Ni/TiO<sub>2</sub>-A; (C) XPS spectra O 1s of (C<sub>1</sub>) 3%Ni/TiO<sub>2</sub>-R, (C<sub>2</sub>) 3%Ni/TiO<sub>2</sub>-A, (C<sub>3</sub>) 0.5%Ni/TiO<sub>2</sub>-A.

Table S1. Ni loading of the supported Ni catalysts

| Sample                     | Ni (wt. %) <sup>a</sup> |
|----------------------------|-------------------------|
| 0.1%Ni/TiO <sub>2</sub> -A | 0.09                    |
| 0.2%Ni/TiO <sub>2</sub> -A | 0.18                    |
| 0.3%Ni/TiO <sub>2</sub> -A | 0.28                    |
| 0.4%Ni/TiO <sub>2</sub> -A | 0.36                    |
| 0.5%Ni/TiO <sub>2</sub> -A | 0.47                    |

<sup>a</sup> Measured by ICP-OES

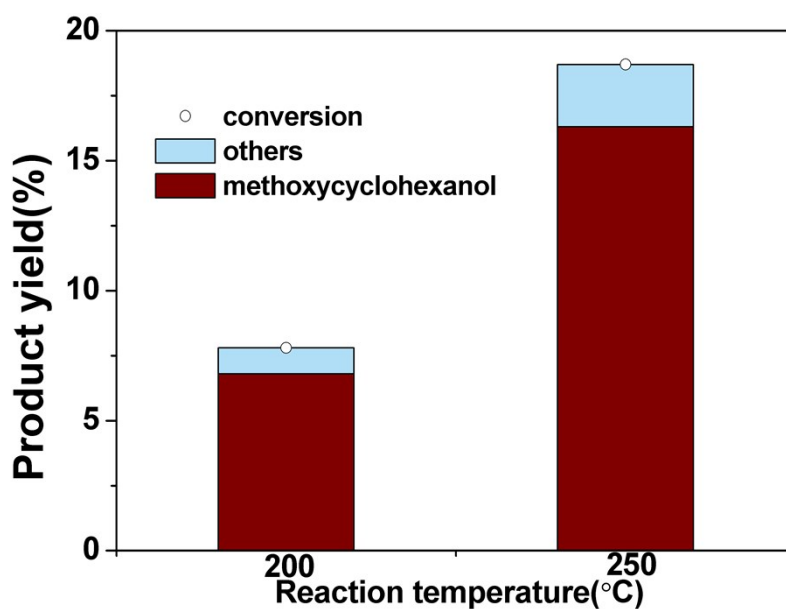

Figure S2. Product yields in guaiacol hydrogenation over 0.5%Ni/TiO<sub>2</sub>-R 400/1h catalysts. “Others” corresponding to unidentified C<sub>8+</sub> heavier products are calculated based on mass balance. Reaction condition: guaiacol 1.20 g, decane 25 mL, P (H<sub>2</sub>) = 4 MPa, 500 rpm, 2 h. Guaiacol conversion is plotted on the same scale.

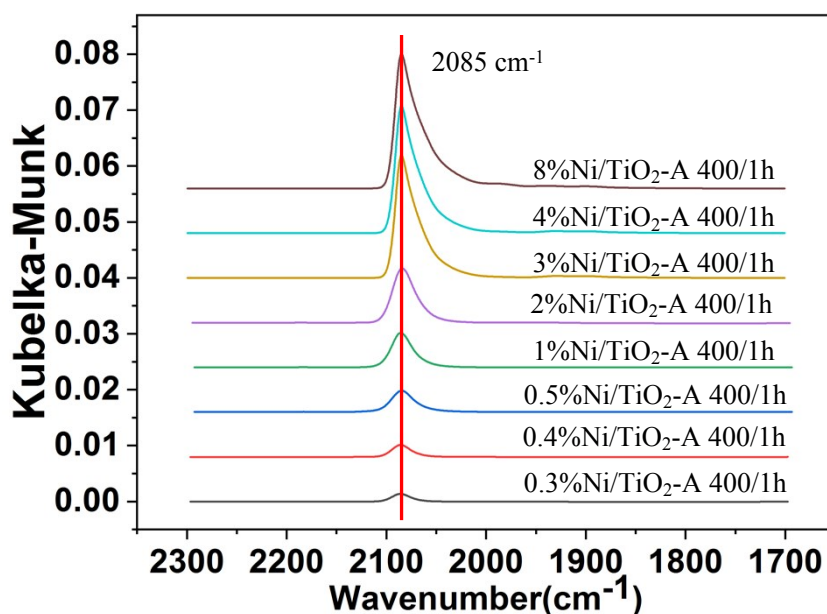

Figure S3. *In-situ* DRIFT spectra of Ni/TiO<sub>2</sub>-A 400/1h with different Ni loadings upon CO chemisorption at 30 °C

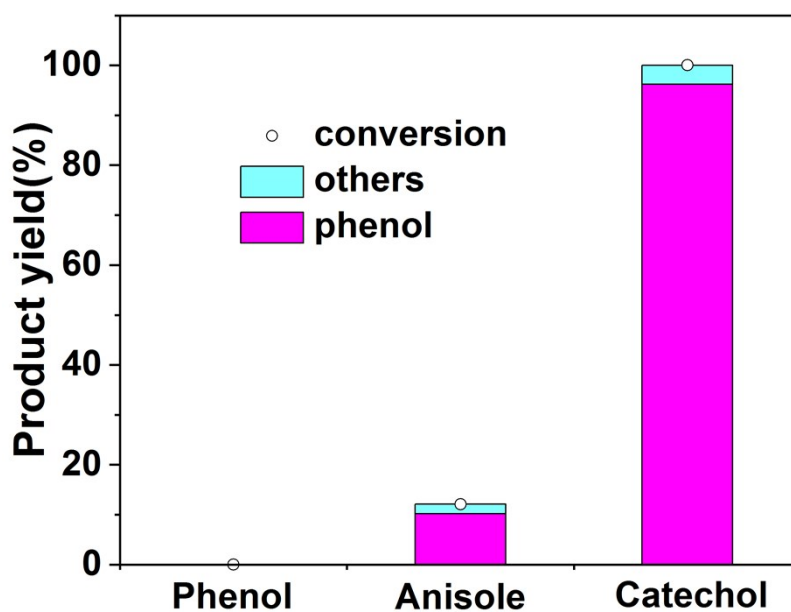

Figure S4. Product yields in other lignin-derived bio-oils (phenol, anisole and catechol) hydrogenation over 3%Ni/TiO<sub>2</sub>-A 400/1h. “Others” corresponding to unidentified heavier products are calculated based on mass balance. Reaction condition: reactant 1.20 g, decane 25 mL, P (H<sub>2</sub>) = 4 MPa, 500 rpm, 2 h.
